# Supplementary material
Source: PubMed Central journal article supplement (PMC4050146)
Supplement: cc-13-1489-s01.pdf [file cc-13-1489-s01.pdf]

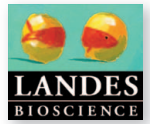

## **Supplemental Material to:**

**Aloysious Aravinthan, George Mells, Michael Allison,  
Julian Leathart, Anna Kotronen, Hannele Yki-Jarvinen,  
Ann K Daly, Christopher P Day, Quentin M Anstee,  
and Graeme Alexander**

**Gene polymorphisms of cellular senescence marker p21  
and disease progression in non-alcohol-related fatty liver  
disease**

**Cell Cycle 2014; 13(9)**

**<http://dx.doi.org/10.4161/cc.28471>**

**<http://www.landesbioscience.com/journals/cc/article/28471>**

## Supplementary Tables

**Supplementary table 1A: Covariate analysis of rs762623 and rs2395655**

| SNP       | OR (L95–U95)        | p-value |
|-----------|---------------------|---------|
| rs762623  | 1.968 (1.007–3.846) | 0.048   |
| rs2395655 | 1.418 (0.947–2.123) | 0.090   |

**Supplementary table 1B: Covariate analysis of rs762623 and rs3176329**

| SNP       | OR (L95–U95)        | p-value |
|-----------|---------------------|---------|
| rs762623  | 2.207 (1.213–4.014) | 0.009   |
| rs3176329 | 0.630 (0.369–1.075) | 0.090   |

Results of logistic regression analysis of rs2395655 conditioned on rs762623 (supplementary table 4A), and rs3176329 conditioned on rs762623 (supplementary table 4B). Note that in the analyses conditioned on rs762623, association with rs2395655 and rs3176329 is no longer significant, reflecting linkage disequilibrium between these SNPs and showing that their effects are not completely independent. OR, odds ratio; L95, lower 95% confidence interval of the OR; U95, upper 95% confidence interval of the OR.

**Supplementary table 2A: Covariate analysis of rs762623 (*CDKN1A*) and rs738409 (*PNPLA3*) in the UK cohort**

| SNP      | OR (L95–U95)        | p-value |
|----------|---------------------|---------|
| rs762623 | 2.335 (1.285–4.244) | 0.005   |
| rs738409 | 1.715 (1.195–2.460) | 0.003   |

Results of logistic regression analysis of rs738409 conditioned on rs762623. OR, odds ratio; L95, lower 95% confidence interval of the OR; U95, upper 95% confidence interval of the OR.

**Supplementary table 2B: Covariate analysis of rs762623 (*CDKN1A*) and rs738409 (*PNPLA3*) in the Finnish cohort**

| SNP      | OR (L95–U95)        | p-value |
|----------|---------------------|---------|
| rs762623 | 2.410 (1.149–5.056) | 0.019   |
| rs738409 | 2.429 (1.289–4.577) | 0.006   |

Results of logistic regression analysis of rs738409 conditioned on rs762623. OR, odds ratio; L95, lower 95% confidence interval of the OR; U95, upper 95% confidence interval of the OR.

**Supplementary table 3: Multivariate analysis of rs762623 in the UK cohort (n=304)**

| Variable    | OR (L95–U95)        | p-value |
|-------------|---------------------|---------|
| Male sex    | 1.280 (0.729–2.250) | 0.390   |
| Age (years) | 1.021 (1.000–1.042) | 0.046   |
| BMI         | 1.077 (1.022–1.135) | 0.005   |
| DM          | 2.302 (1.346–3.936) | 0.002   |

|            |                     |       |
|------------|---------------------|-------|
| rs762623-A | 2.195 (1.179–4.084) | 0.013 |
|------------|---------------------|-------|

Results from multivariate logistic regression analysis of rs762623 and clinical covariates in the UK cohort. Note that in this analysis, association with rs762623 remained significant at  $p < 0.05$ , indicating that the effect of the SNP is independent of clinical variables included in the model. OR, odds ratio; L95, lower 95% confidence interval of the OR; U95, upper 95% confidence interval of the OR; BMI, body mass index; DM, diabetes mellitus

**Supplementary table 4: Multivariate analysis of rs762623 in the Finnish cohort (n=121)**

| Variable    | OR (L95–U95)        | P-value |
|-------------|---------------------|---------|
| Male sex    | 0.945 (0.406–2.199) | 0.8949  |
| Age (years) | 1.024 (0.978–1.072) | 0.3152  |
| BMI         | 1.022 (0.976–1.070) | 0.3509  |
| DM          | 3.172 (1.272–7.912) | 0.0133  |
| rs762623-A  | 2.546 (1.170–5.540) | 0.0184  |

Results from multivariate logistic regression analysis of rs762623 and clinical covariates in the Finnish cohort. Note that in this analysis, association with rs762623 remained significant at  $p < 0.05$ , indicating that the effect of the SNP is independent of clinical variables included in the model. OR, odds ratio; L95, lower 95% confidence interval of the OR; U95, upper 95% confidence interval of the OR; BMI, body mass index; DM, diabetes mellitus

**Supplementary table 5: Multivariate analysis of rs762623 in the combined UK and Finnish cohort**

| Variable     | OR (L95–U95)        | P-value  |
|--------------|---------------------|----------|
| Male sex     | 1.144 (0.716–1.829) | 0.566    |
| Age (years)  | 1.020 (1.001–1.040) | 0.030    |
| BMI          | 1.046 (1.011–1.082) | 0.008    |
| DM           | 2.500 (1.570–3.981) | 0.0001   |
| UK ethnicity | 5.056 (2.829–9.036) | 2.37E-08 |
| rs762623-A   | 2.444 (1.487–4.017) | 0.0003   |

Logistic regression to determine the effect of rs762623 on fibrosis in the combined UK and Finnish Cohort, with ethnicity, sex, age, DM and BMI included as covariates. Controls are patients with steatosis but no fibrosis on liver biopsy (fibrosis stage = 0). Cases are patients with steatosis and ANY fibrosis on liver biopsy (fibrosis stage  $\geq 1$ ). A log-additive genetic model is assumed. OR odds ratio; L95 lower 95% confidence interval of the odds ratio; U95 upper 95% confidence interval of the odds ratio.

**Supplementary table 6: Multinomial logistic regression analysis of diabetes mellitus with nationality included as a covariate**

| Fibrosis               | OR (L95–U95)        | p-value  |
|------------------------|---------------------|----------|
| Stage 0 versus stage 1 | 2.314 (1.393–3.842) | 0.0012   |
| Stage 0 versus stage 2 | 1.902 (0.981–3.685) | 0.0568   |
| Stage 0 versus stage 3 | 5.633 (2.935–10.81) | 2.01E-07 |
| Stage 0 versus stage 4 | 7.491 (3.248–17.27) | 2.32E-06 |
| Stage 1 versus stage 2 | 0.822 (0.416–1.623) | 0.5723   |

|                        |                     |        |
|------------------------|---------------------|--------|
| Stage 1 versus stage 3 | 2.435 (1.248–4.750) | 0.0091 |
| Stage 1 versus stage 4 | 3.238 (1.388–7.550) | 0.0065 |
| Stage 2 versus stage 3 | 2.962 (1.367–6.417) | 0.0059 |
| Stage 2 versus stage 4 | 3.939 (1.555–9.978) | 0.0038 |
| Stage 3 versus stage 4 | 1.330 (0.532–3.324) | 0.5420 |

Multinomial logistic regression to determine the effect of diabetes mellitus on the development of different stages of fibrosis in the combined UK and Finnish Cohort, with nationality included as a covariate. The reference level of fibrosis ranges from fibrosis stage 0 to 4.
